# Supplementary material
Source: Springer Nature journal article supplement (https://www.springermedizin.de/resource/supplementary/12990_2013_626_MOESM6_ESM.pdf/9612232)

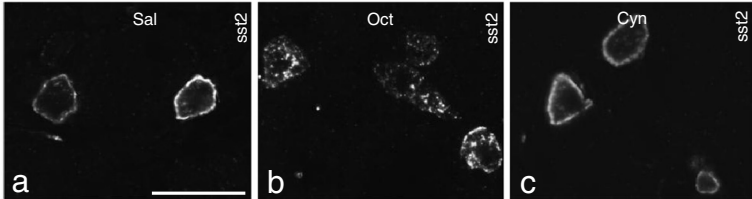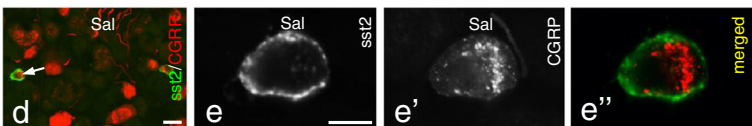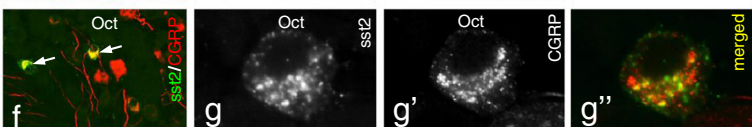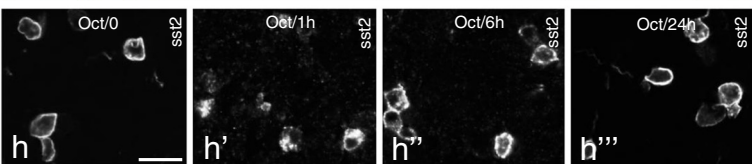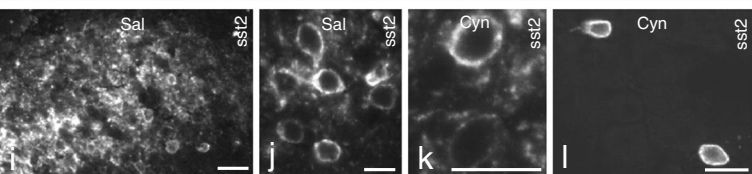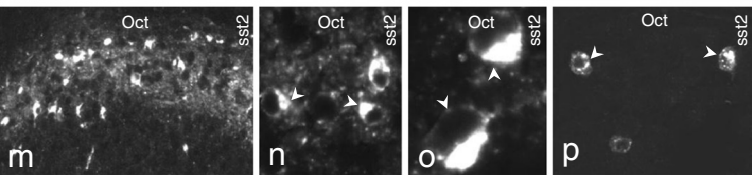

Supplement: MOESM6 [file 9612232]
